Anesthesiology  
78:524-530, 1993  
© 1993 American Society of Anesthesiologists, Inc.  
J. B. Lippincott Company, Philadelphia

## Role of Imidazoline-preferring Receptors in the Genesis of Epinephrine-induced Arrhythmias in Halothane-anesthetized Dogs

Yukio Hayashi, M.D.,\* Takahiko Kamibayashi, M.D.,† Mervyn Maze, M.B., Ch.B.,‡ Atsushi Yamatodani, M.D.,§ Koji Sumikawa, M.D.,|| Masakazu Kuro, M.D.,¶ Ikuto Yoshiya, M.D.#

**Background:** Drugs with a central  $\alpha_2$ -adrenergic action can increase the threshold for halothane-epinephrine-induced arrhythmias. Recently, imidazoline-preferring receptors were shown to play a significant role in the hypotensive effect of  $\alpha_2$ -adrenergic agonists containing an imidazole ring in their structure. To address the question of whether the antiarrhythmic property of the  $\alpha_2$ -adrenergic agonists was caused by activation of  $\alpha_2$ -adrenoceptors or imidazoline-preferring receptors in the central nervous system, the effect of an imidazoline (atipamezole) and a nonimidazoline (L-659,066 and yohimbine)  $\alpha_2$ -adrenergic antagonist were examined as etiologic factors in the genesis of halothane-epinephrine-induced arrhythmias in dogs.

**Methods:** Adult mongrel dogs were anesthetized with halothane (1.3%) and monitored continuously for systemic arterial pressure and for premature ventricular contractions. The arrhythmogenic dose (AD) of epinephrine, defined as the smallest dose producing four or more premature ventricular contractions within a 15-s period, was determined in the presence of atipamezole (an imidazoline compound that crosses the

blood-brain barrier), L-659,066 (a nonimidazoline compound that does not penetrate the blood-brain barrier), and yohimbine (a nonimidazoline compound that passes the blood-brain barrier). These drugs were administered either intravenously or into the cisterna magna to assess the site of action for changes in responsiveness.

**Results:** Intravenous atipamezole decreased the AD of epinephrine in the dose-dependent fashion. However, neither L-659,066 nor yohimbine, administered peripherally, decreased the AD of epinephrine. Central administration of atipamezole also decreased the AD of epinephrine, while L-659,066, even if administered centrally, did not affect the AD of epinephrine in the presence of halothane.

**Conclusions:** Because the imidazoline ring-containing  $\alpha_2$ -adrenergic antagonist (atipamezole) potentiated the halothane-epinephrine-induced arrhythmias and the nonimidazole  $\alpha_2$ -adrenergic antagonist (L-659,066 and yohimbine) did not, it is possible that the imidazoline-preferring, rather than the  $\alpha_2$ -adrenergic, receptor is responsible for the antiarrhythmic property of  $\alpha_2$ -adrenergic agonists. (Key words: Anesthetics, volatile: halothane. Heart: arrhythmias. Receptors:  $\alpha_2$ -adrenergic; imidazoline preferring. Sympathetic nervous system:  $\alpha_2$  antagonist; atipamezole; catecholamine; epinephrine; L-659,066.)

$\alpha_2$ -ADRENOCEPTORS are distributed widely throughout the central nervous system and play a significant role in the regulation of several physiologic processes.<sup>1</sup> Previously, we reported that dexmedetomidine, a highly selective  $\alpha_2$ -adrenergic agonist, increased the threshold for the development of halothane-epinephrine-induced arrhythmias through a central action.<sup>2</sup> Indeed, halothane-epinephrine-induced arrhythmias are but one of several types of arrhythmias that are modulated by central  $\alpha_2$ -adrenergic action.<sup>3</sup>

Both functional and radioligand binding studies indicate the existence of another class of receptors or binding sites that resemble the  $\alpha_2$ -adrenoceptors. These sites bind selectively  $\alpha_2$ -adrenergic ligands that are either imidazoline (e.g., clonidine or idazoxan) or oxazolines (e.g., rilmenidine) but have a low affinity for agonists or antagonists without the imidazoline or oxazoline structure, such as epinephrine and yohim-

\* Staff Physician, Department of Anesthesiology, National Cardiovascular Center.

† Research Fellow, Department of Anesthesiology, Osaka University Medical School, Osaka, Japan.

‡ Associate Professor, Department of Anesthesia, Stanford University School of Medicine, Stanford, California.

§ Associate Professor, Molecular Physiological Chemistry and Pharmacology, Osaka University Medical School, Osaka, Japan.

|| Professor, Department of Anesthesiology, Nagasaki University School of Medicine, Nagasaki, Japan.

¶ Director, Department of Anesthesiology, National Cardiovascular Center.

# Professor, Department of Anesthesiology, Osaka University Medical School, Osaka, Japan.

Received from the Department of Anesthesiology, National Cardiovascular Center, Osaka, Japan. Accepted for publication November 16, 1992. Supported by the Uehara Memorial Fund in Japan and a grant-in-aid for scientific research (B) from the Ministry of Education, Science, and Culture in Japan.

Address reprint requests to Dr. Hayashi: Anesthesiology Service, VA Medical Center, 3801 Miranda Avenue, Palo Alto, California 94304.

6. Kamisaki Y, Ishikawa T, Takao Y, Omodani H, Kuno N, Itoh T: Binding of [<sup>3</sup>H]p-aminoclonidine to two sites, alpha<sub>2</sub>-adrenoceptors and imidazoline binding sites: Distribution of imidazoline binding sites in rat brain. *Brain Res* 514:15-21, 1990
7. Tibirica E, Feldman J, Mermut C, Monassier L, Gonon F, Bousquet P: Selectivity of rilmenidine for the nucleus reticularis lateralis, a ventrolateral medullary structure containing imidazoline-preferring receptors. *Eur J Pharmacol* 209:213-221, 1991
8. Bousquet P, Feldman J, Schwartz J: Central cardiovascular effects of alpha adrenergic drugs: Differences between catecholamines and imidazolines. *J Pharmacol Exp Ther* 230:232-236, 1984
9. Tibirica E, Feldman J, Mermut C, Gonon F, Bousquet P: An imidazoline-specific mechanism for the hypotensive effect of clonidine: A study with yohimbine and idazoxan. *J Pharmacol Exp Ther* 256:606-613, 1991
10. Virtanen R, Savola J-M, Sanno V: Highly selective and specific antagonism of central and peripheral alpha<sub>2</sub>-adrenoceptors by atipamezole. *Arch Int Pharmacodyn Ther* 297:190-204, 1988
11. Hoffman BB, Lefkowitz RJ: Adrenergic receptor antagonist, *The Pharmacological Basis of Therapeutics*. 8th edition. Edited by Gilman AG, Rall TW, Nies AS, Traylor P. New York, Pergamon Press, 1990, pp 221-243
12. Clineschmidt BV, Pettibone DJ, Lotti VJ, Hucker HB, Sweeney BM, Reiss DR, Lis EV, Huff JR, Vacca J: A peripheral acting alpha<sub>2</sub> adrenergic antagonist: L-659,066. *J Pharmacol Exp Ther* 245:32-40, 1988
13. Hayashi Y, Sumikawa K, Yamatodani A, Kamibayashi T, Kuro M, Yoshiya I: Myocardial epinephrine sensitization with subanesthetic concentrations of halothane in dogs. *ANESTHESIOLOGY* 74:134-137, 1991
14. Nohta H, Mitsui A, Ohkura Y: Spectrofluorimetric determination of catecholamines with 1,2-diphenylethylenediamine. *Anal Chim Acta* 165:171-175, 1987
15. Doze VA, Chen B-X, Maze M: Dexmedetomidine produces a hypnotic-anesthetic action in rats via activation of central alpha<sub>2</sub> adrenoceptors. *ANESTHESIOLOGY* 71:75-79, 1989
16. Doxey JC, Roach AG, Smith CFC: Studies on RX 781094: A selective, potent and specific antagonism of alpha<sub>2</sub>-adrenoceptors. *Br J Pharmacol* 78:489-505, 1983
17. Maze M, Smith CM: Identification of receptor mechanism mediating epinephrine-induced arrhythmias during halothane anesthesia in dogs. *ANESTHESIOLOGY* 59:322-326, 1983
18. Ernsberger P, Meeley MP, Mann JJ, Reis DJ: Clonidine binds to imidazole binding sites as well as alpha<sub>2</sub>-adrenoceptors in the ventrolateral medulla. *Eur J Pharmacol* 134:1-13, 1987
19. Brica G, Dontenwell M, Molines A, Feldman J, Belcourt A, Bousquet P: Evidence for the existence of a homogenous population of imidazoline receptors in the human brainstem. *Eur J Pharmacol* 150:401-402, 1988
20. Ross CA, Ruggiero DA, Reis DJ: Projections from the nucleus solitarius to the rostral ventrolateral medulla. *J Comp Neurol* 242:511-534, 1985
21. Ernsberger P, Giuliano R, Willette N, Reis DJ: Role of imidazole receptors in the vasodepressor response to clonidine analogs in the rostral ventrolateral medulla. *J Pharmacol Exp Ther* 253:408-418, 1990
22. Waxman MB, Sharma AD, Asta J, Cameron DA, Wald RW: The protective effect of vagus nerve stimulation on catecholamines-halothane-induced ventricular fibrillation in dogs. *Can J Physiol Pharmacol* 67:801-809, 1989
23. Bylund DB: Heterogeneity of alpha<sub>2</sub> adrenergic receptors. *Pharmacol Biochem Behav* 22:835-843, 1985
24. Bylund DB: Subtypes of alpha<sub>2</sub>-adrenoceptors: Pharmacological and molecular biological evidence converge. *Trends Pharmacol Sci* 9:356-361, 1988
25. Nahorski SR, Barnett DB, Cheung YD: Alpha-adrenoceptor-effector coupling: Affinity states or heterogeneity of the alpha<sub>2</sub>-adrenoceptor? *Clin Sci* 68(suppl 10):39s-42s, 1985
26. Connaughton S, Docherty JR: Functional evidence for heterogeneity of peripheral prejunctional alpha<sub>2</sub>-adrenoceptors. *Br J Pharmacol* 101:285-290, 1990
27. Bergamaschi M: Role of the sympathetic and parasympathetic innervation in the genesis of ventricular arrhythmias during experimental myocardial ischemia, *Neural Mechanism in Cardiac Arrhythmias*. Edited by Schwartz PJ, Brown AM, Malliani A, Zanchetti A. New York, Raven Press, 1978, pp 139-154
28. Gran H, Ruskin JN, Powell WJ Jr: Centrally mediated effect of phenytoin on digoxin-induced ventricular arrhythmias. *Am J Physiol* 241:H67-H72, 1981
29. Hayashi Y, Kamibayashi T, Sumikawa K, Yamatodani A, Kuro M, Yoshiya I: Phenytoin prevents epinephrine-induced arrhythmias through central nervous system in halothane-anesthetized dogs. *Res Commun Chem Pathol Pharmacol* 74:59-70, 1991
30. Vickery RG, Sheridan BC, Segal IS, Maze M: Anesthetic and hemodynamic effects of the stereoisomers of medetomidine, an alpha<sub>2</sub> agonist, in halothane-anesthetized dogs. *Anesth Analg* 67:818-823, 1988
31. Segal IS, Vickery RG, Walton JK, Doze VA, Maze M: Dexmedetomidine diminishes halothane anesthetic requirements in rats through a postsynaptic alpha<sub>2</sub>-adrenergic receptor. *ANESTHESIOLOGY* 69:818-823, 1988
32. Sumikawa K, Ishizaka N, Suzuki M: Arrhythmogenic plasma levels of epinephrine during halothane, enflurane, and pentobarbital anesthesia in the dog. *ANESTHESIOLOGY* 58:322-325, 1983
33. Woehick HJ, Rusy BF, Atlee JL: Comparison of logdose and bracket protocols for determination of epinephrine arrhythmia thresholds in dogs anesthetized with thiopental-halothane. *ANESTHESIOLOGY* 75:884-892, 1991
34. Atlee JL, Bosnjak ZJ: Mechanisms for cardiac dysrhythmias during anesthesia. *ANESTHESIOLOGY* 72:347-374, 1990
35. Raynold AK: On the mechanism of myocardial sensitization to catecholamines by hydrocarbon anesthetics. *Can J Physiol Pharmacol* 62:183-198, 1983
